# Supplementary material for: Changes in Physical Activity and Sedentary Behavior in Response to COVID-19 and Their Associations with Mental Health in 3052 US Adults
Source: PubMed Central journal article supplement (PMC7559240; doi:10.3390/ijerph17186469), 2020-09-05
Supplement: ijerph-17-06469-s001.pdf [file ijerph-17-06469-s001.pdf]

**Table S1.** Adjusted associations between COVID-19 related public health restrictions and mental health

|                                   | <i>n</i> | Depression       |                 | Anxiety          |                 | Loneliness        |                 | Stress           |                 | Social Network   |                 | Positive Mental health |                 |
|-----------------------------------|----------|------------------|-----------------|------------------|-----------------|-------------------|-----------------|------------------|-----------------|------------------|-----------------|------------------------|-----------------|
|                                   |          | <b>b (SE)</b>    | <i>p</i> -value | <b>b (SE)</b>    | <i>p</i> -value | <b>b (SE)</b>     | <i>p</i> -value | <b>b (SE)</b>    | <i>p</i> -value | <b>b (SE)</b>    | <i>p</i> -value | <b>b (SE)</b>          | <i>p</i> -value |
| <b>Public Health Restrictions</b> |          |                  |                 |                  |                 |                   |                 |                  |                 |                  |                 |                        |                 |
| Social distancing                 | 550      | REF              |                 | REF              |                 | REF               |                 | REF              |                 | REF              |                 | REF                    |                 |
| Stay at home                      | 1462     | 0.320<br>(0.297) | 0.282           | 0.491<br>(0.285) | 0.085           | -0.019<br>(0.067) | 0.778           | 0.169<br>(0.111) | 0.127           | 0.220<br>(0.105) | 0.035           | -0.058<br>(0.162)      | 0.718           |
| Self-isolation                    | 1040     | 1.427<br>(0.424) | <0.001          | 1.640<br>(0.440) | <0.001          | 0.082<br>(0.090)  | 0.364           | 0.250<br>(0.146) | 0.086           | 0.084<br>(0.142) | 0.557           | -0.171<br>(0.226)      | 0.451           |

Adjusted for age, sex, race, smoking, physical activity, sitting time, screen time, relationship status, employment, and chronic illnesses. Education was excluded due to multicollinearity. b = adjusted unstandardized beta; SE = standard error.

Statistical significance set at  $p < 0.00833$

**Table S2.** Adjusted associations between changes in behavior from before to after COVID-19 related public health restrictions including covariates with mental health outcomes

|                          | <i>n</i> | Depression     |                 | Anxiety          |                 | Loneliness        |                 | Stress            |                 | Social Network    |                 | Positive Mental Health |                 |
|--------------------------|----------|----------------|-----------------|------------------|-----------------|-------------------|-----------------|-------------------|-----------------|-------------------|-----------------|------------------------|-----------------|
|                          |          | <b>b (SE)</b>  | <i>p</i> -value | <b>b (SE)</b>    | <i>p</i> -value | <b>b (SE)</b>     | <i>p</i> -value | <b>b (SE)</b>     | <i>p</i> -value | <b>b (SE)</b>     | <i>p</i> -value | <b>b (SE)</b>          | <i>p</i> -value |
| <b>Physical Activity</b> |          |                |                 |                  |                 |                   |                 |                   |                 |                   |                 |                        |                 |
| Maintained high          | 798      | REF            |                 | REF              |                 | REF               |                 | REF               |                 | REF               |                 | REF                    |                 |
| Increased                | 152      | -0.505 (0.645) | 0.434           | 0.066<br>(0.677) | 0.923           | 0.001<br>(0.136)  | 0.996           | -0.133<br>(0.244) | 0.585           | 0.305<br>(0.222)  | 0.169           | 0.189<br>(0.345)       | 0.585           |
| Decreased                | 563      | 1.960 (0.417)  | <0.001          | 0.596<br>(0.411) | 0.148           | 0.340<br>(0.096)  | <0.001          | 0.522<br>(0.155)  | <0.001          | -0.269<br>(0.149) | 0.072           | -1.010<br>(0.230)      | <0.001          |
| Maintained low           | 1539     | 0.629 (0.318)  | 0.048           | 0.248<br>(0.320) | 0.439           | 0.078<br>(0.075)  | 0.302           | 0.377<br>(0.124)  | 0.002           | -0.389<br>(0.119) | 0.001           | -0.629<br>(0.182)      | <0.001          |
| <b>Sitting Time</b>      |          |                |                 |                  |                 |                   |                 |                   |                 |                   |                 |                        |                 |
| Maintained low           | 1041     | REF            |                 | REF              |                 | REF               |                 | REF               |                 | REF               |                 | REF                    |                 |
| Decreased                | 85       | 0.587 (0.972)  | 0.546           | 1.497<br>(0.944) | 0.113           | -0.067<br>(0.197) | 0.728           | -0.015<br>(0.329) | 0.964           | 0.074<br>(0.273)  | 0.786           | -0.122<br>(0.505)      | 0.809           |
| Increased                | 582      | 0.918 (0.441)  | 0.037           | 0.946<br>(0.445) | 0.034           | 0.195<br>(0.097)  | 0.045           | 0.253<br>(0.154)  | 0.102           | -0.163<br>(0.149) | 0.275           | -0.673<br>(0.234)      | 0.005           |

|                                   |      |                |        |                   |        |                   |        |                   |        |                   |        |                   |        |
|-----------------------------------|------|----------------|--------|-------------------|--------|-------------------|--------|-------------------|--------|-------------------|--------|-------------------|--------|
| Maintained high                   | 1344 | -0.199 (0.348) | 0.566  | -0.064<br>(0.344) | 0.852  | 0.046<br>(0.078)  | 0.554  | -0.068<br>(0.131) | 0.604  | -0.040<br>(0.126) | 0.750  | -0.036<br>(0.192) | 0.853  |
| <b>Screen Time</b>                |      |                |        |                   |        |                   |        |                   |        |                   |        |                   |        |
| Maintained low                    | 1512 | <b>REF</b>     |        | <b>REF</b>        |        | <b>REF</b>        |        | <b>REF</b>        |        | <b>REF</b>        |        | <b>REF</b>        |        |
| Decreased                         | 45   | -0.623 (1.095) | 0.569  | 0.345<br>(1.203)  | 0.774  | -0.495<br>(0.198) | 0.013  | -0.261<br>(0.468) | 0.577  | 0.762<br>(0.393)  | 0.052  | 0.412<br>(0.641)  | 0.520  |
| Increased                         | 562  | 1.924 (0.441)  | <0.001 | 1.341<br>(0.454)  | 0.003  | 0.340<br>(0.095)  | <0.001 | 0.590<br>(0.154)  | <0.001 | -0.069<br>(0.145) | 0.632  | -0.920<br>(0.239) | <0.001 |
| Maintained high                   | 933  | 0.375 (0.392)  | 0.339  | 0.474<br>(0.375)  | 0.206  | 0.146<br>(0.085)  | 0.087  | 0.126<br>(0.137)  | 0.361  | -0.156<br>(0.133) | 0.243  | -0.451<br>(0.202) | 0.026  |
| <b>Public Health Restrictions</b> |      |                |        |                   |        |                   |        |                   |        |                   |        |                   |        |
| Social distancing                 | 550  | <b>REF</b>     |        | <b>REF</b>        |        | <b>REF</b>        |        | <b>REF</b>        |        | <b>REF</b>        |        | <b>REF</b>        |        |
| Stay at home                      | 1462 | 0.320 (0.297)  | 0.282  | 0.491<br>(0.285)  | 0.085  | -0.019<br>(0.067) | 0.778  | 0.169<br>(0.111)  | 0.127  | 0.220<br>(0.105)  | 0.035  | -0.058<br>(0.162) | 0.718  |
| Self-isolation                    | 1040 | 1.427 (0.424)  | <0.001 | 1.640<br>(0.440)  | <0.001 | 0.082<br>(0.090)  | 0.364  | 0.250<br>(0.146)  | 0.086  | 0.084<br>(0.142)  | 0.557  | -0.171<br>(0.226) | 0.451  |
| <b>Age</b>                        |      |                |        |                   |        |                   |        |                   |        |                   |        |                   |        |
| 18–24                             | 508  | <b>REF</b>     |        | <b>REF</b>        |        | <b>REF</b>        |        | <b>REF</b>        |        | <b>REF</b>        |        | <b>REF</b>        |        |
| 25–34                             | 470  | -2.940 (0.712) | <0.001 | -2.067<br>(0.715) | 0.004  | -0.158<br>(0.134) | 0.238  | -0.487<br>(0.216) | 0.024  | -0.400<br>(0.200) | 0.045  | 0.892<br>(0.333)  | 0.007  |
| 35–44                             | 419  | -3.506 (0.754) | <0.001 | -3.184<br>(0.731) | <0.001 | -0.289<br>(0.146) | 0.048  | -0.642<br>(0.241) | 0.008  | -0.524<br>(0.220) | 0.017  | 1.230<br>(0.367)  | 0.001  |
| 45–54                             | 376  | -5.132 (0.762) | <0.001 | -4.211<br>(0.727) | <0.001 | -0.466<br>(0.148) | 0.002  | -1.204<br>(0.244) | <0.001 | -0.448<br>(0.229) | 0.051  | 2.032<br>(0.374)  | <0.001 |
| 55–64                             | 474  | -7.497 (0.731) | <0.001 | -5.997<br>(0.694) | <0.001 | -0.518<br>(0.149) | 0.001  | -1.793<br>(0.240) | <0.001 | -0.465<br>(0.225) | 0.039  | 3.386<br>(0.365)  | <0.001 |
| 65–74                             | 522  | -8.571 (0.790) | <0.001 | -6.299<br>(0.757) | <0.001 | -0.604<br>(0.165) | <0.001 | -2.374<br>(0.278) | <0.001 | -0.386<br>(0.259) | 0.136  | 4.444<br>(0.428)  | <0.001 |
| 75+                               | 283  | -8.701 (0.822) | <0.001 | -6.093<br>(0.795) | <0.001 | -0.885<br>(0.189) | <0.001 | -2.159<br>(0.315) | <0.001 | -0.688<br>(0.291) | 0.018  | 4.966<br>(0.489)  | <0.001 |
| <b>Sex</b>                        |      |                |        |                   |        |                   |        |                   |        |                   |        |                   |        |
| Male                              | 1151 | <b>REF</b>     |        | <b>REF</b>        |        | <b>REF</b>        |        | <b>REF</b>        |        | <b>REF</b>        |        | <b>REF</b>        |        |
| Female                            | 1897 | 1.658 (0.284)  | <0.001 | 3.323<br>(0.259)  | <0.001 | 0.218<br>(0.065)  | 0.001  | 0.622<br>(0.106)  | <0.001 | 0.627<br>(0.104)  | <0.001 | -0.947<br>(0.163) | <0.001 |
| Transgender                       | 4    | -0.825 (2.053) | 0.688  | 4.484<br>(4.451)  | 0.314  | -0.028<br>(0.325) | 0.932  | 0.401<br>(1.043)  | 0.700  | 1.363<br>(0.810)  | 0.093  | -0.244<br>(1.176) | 0.836  |
| <b>Race</b>                       |      |                |        |                   |        |                   |        |                   |        |                   |        |                   |        |
| White                             | 2848 | <b>REF</b>     |        | <b>REF</b>        |        | <b>REF</b>        |        | <b>REF</b>        |        | <b>REF</b>        |        | <b>REF</b>        |        |
| Other                             | 204  | 0.307 (0.652)  | 0.638  | -0.178<br>(0.627) | 0.776  | 0.115<br>(0.131)  | 0.380  | -0.275<br>(0.200) | 0.169  | -0.329<br>(0.201) | 0.102  | 0.073<br>(0.318)  | 0.819  |

|                                                 |      |                |        |                   |        |                   |        |                   |        |                   |        |                   |        |
|-------------------------------------------------|------|----------------|--------|-------------------|--------|-------------------|--------|-------------------|--------|-------------------|--------|-------------------|--------|
| <b>Body Mass Index</b><br>(per 1-unit increase) | 3052 | 0.104 (0.028)  | <0.001 | 0.059<br>(0.026)  | 0.023  | 0.008<br>(0.006)  | 0.152  | -0.003<br>(0.009) | 0.765  | -0.024<br>(0.009) | 0.007  | 0.006<br>(0.014)  | 0.690  |
| <b>Smoker</b>                                   |      |                |        |                   |        |                   |        |                   |        |                   |        |                   |        |
| Yes                                             | 80   | <b>REF</b>     |        | <b>REF</b>        |        | <b>REF</b>        |        | <b>REF</b>        |        | <b>REF</b>        |        | <b>REF</b>        |        |
| No                                              | 2972 | -2.616 (1.021) | 0.010  | -2.908<br>(1.002) | 0.004  | -0.104<br>(0.187) | 0.579  | -0.353<br>(0.326) | 0.279  | 0.258<br>(0.306)  | 0.399  | 0.959<br>(0.453)  | 0.034  |
| <b>Marital Status</b>                           |      |                |        |                   |        |                   |        |                   |        |                   |        |                   |        |
| Married                                         | 2070 | <b>REF</b>     |        | <b>REF</b>        |        | <b>REF</b>        |        | <b>REF</b>        |        | <b>REF</b>        |        | <b>REF</b>        |        |
| Widowed                                         | 93   | -0.655 (0.513) | 0.202  | -1.211<br>(0.497) | 0.015  | 0.952<br>(0.194)  | <0.001 | -0.321<br>(0.257) | 0.212  | -0.505<br>(0.300) | 0.093  | -0.979<br>(0.394) | 0.013  |
| Separated/divorced                              | 178  | 0.898 (0.551)  | 0.103  | 0.090<br>(0.493)  | 0.855  | 1.054<br>(0.153)  | <0.001 | -0.128<br>(0.216) | 0.553  | -0.577<br>(0.215) | 0.007  | -0.251<br>(0.289) | 0.384  |
| Never married                                   | 711  | 0.419 (0.481)  | 0.384  | -0.184<br>(0.478) | 0.700  | 0.966<br>(0.101)  | <0.001 | 0.104<br>(0.159)  | 0.515  | -0.641<br>(0.148) | <0.001 | -0.621<br>(0.235) | 0.008  |
| <b>Employment Status</b>                        |      |                |        |                   |        |                   |        |                   |        |                   |        |                   |        |
| Employed                                        | 1767 | <b>REF</b>     |        | <b>REF</b>        |        | <b>REF</b>        |        | <b>REF</b>        |        | <b>REF</b>        |        | <b>REF</b>        |        |
| Retired                                         | 785  | -0.326 (0.386) | 0.399  | -0.261<br>(0.354) | 0.461  | -0.032<br>(0.107) | 0.765  | -0.212<br>(0.182) | 0.242  | -0.393<br>(0.179) | 0.028  | -0.091<br>(0.270) | 0.737  |
| Other                                           | 403  | 1.729 (0.621)  | 0.005  | 1.800<br>(0.625)  | 0.004  | 0.060<br>(0.116)  | 0.606  | 0.78<br>(0.183)   | <0.001 | -0.005<br>(0.172) | 0.979  | -0.698<br>(0.287) | 0.015  |
| Unemployed                                      | 97   | 2.409 (1.005)  | 0.017  | 0.705<br>(1.030)  | 0.494  | 0.326<br>(0.191)  | 0.089  | 1.551<br>(0.289)  | <0.001 | -0.973<br>(0.283) | 0.001  | -1.477<br>(0.453) | 0.001  |
| <b>Chronic Illnesses</b>                        |      |                |        |                   |        |                   |        |                   |        |                   |        |                   |        |
| 0                                               | 2163 | <b>REF</b>     |        | <b>REF</b>        |        | <b>REF</b>        |        | <b>REF</b>        |        | <b>REF</b>        |        | <b>REF</b>        |        |
| 1                                               | 263  | 1.669 (0.537)  | 0.002  | 1.811<br>(0.529)  | 0.001  | 0.161<br>(0.110)  | 0.141  | 0.669<br>(0.185)  | <0.001 | -0.239<br>(0.171) | 0.161  | -0.900<br>(0.270) | 0.001  |
| 2+                                              | 626  | 2.859 (0.362)  | <0.001 | 3.177<br>(0.339)  | <0.001 | 0.378<br>(0.081)  | <0.001 | 0.719<br>(0.131)  | <0.001 | -0.204<br>(0.121) | 0.091  | -1.160<br>(0.198) | <0.001 |

b = adjusted unstandardized beta; SE = standard error.

**Table S3.** Tests of interactions between public health restrictions and physical activity change, sitting time change, and screen time change derived from linear regressions

| Interaction Term             | Depression             |         | Anxiety                |         | Loneliness             |         | Stress                 |         | Social Network         |         | Positive Mental Health |         |
|------------------------------|------------------------|---------|------------------------|---------|------------------------|---------|------------------------|---------|------------------------|---------|------------------------|---------|
|                              | F <sub>(6, 3022)</sub> | p-value | F <sub>(6, 3022)</sub> | p-value | F <sub>(6, 3022)</sub> | p-value | F <sub>(6, 3022)</sub> | p-value | F <sub>(6, 3022)</sub> | p-value | F <sub>(6, 3022)</sub> | p-value |
| Public health restrictions X |                        |         |                        |         |                        |         |                        |         |                        |         |                        |         |
| Physical activity change     | 0.54                   | 0.775   | 0.21                   | 0.973   | 0.64                   | 0.702   | 0.35                   | 0.911   | 0.95                   | 0.459   | 0.25                   | 0.960   |
| Sitting time change          | 1.00                   | 0.422   | 0.39                   | 0.888   | 2.01                   | 0.061   | 1.51                   | 0.170   | 1.49                   | 0.179   | 1.02                   | 0.407   |
| Screen time change           | 1.39                   | 0.215   | 1.47                   | 0.183   | 2.17                   | 0.043   | 3.30                   | 0.003   | 0.35                   | 0.911   | 2.64                   | 0.015   |

Statistical significance set at  $p < 0.00278$
